# Supplementary material
Source: Copernicus journal article supplement (doi:10.5194/essd-2026-206)
Supplement: Supplementary file 1 [file essd-2026-206-supplement.pdf]

## Supplementary Materials for

### PlanetGSD: A Global Dataset of Grain-Size Distributions from Earth, the Moon, and Mars

Jun Zhang<sup>1,2</sup>, Yong Li<sup>1\*</sup>

<sup>1</sup> Key Laboratory of Mountain Hazards and Engineering Resilience /Institute of Mountain Hazards and Environment, Chinese Academy of Sciences, Chengdu 610213, China

<sup>2</sup> State Key Laboratory of Hydrosience and Engineering; Department of Hydraulic Engineering, Tsinghua University, Beijing 100084, China

#### Contents of this file

**Text S1.** Terrestrial field sampling and laboratory analysis

**Figure S1.** Grain size analysis procedure and parameter framework

**Table S1.** Terrestrial soil sampling sites in Asia

**Table S2.** Terrestrial soil sampling sites in North America

**Table S3.** Terrestrial soil sampling sites in Africa

**Table S4.** Terrestrial soil sampling sites in Europe

**Table S5.** Terrestrial soil sampling sites in Australia

**Text S2.** Literature-derived terrestrial samples

**Text S3.** Lunar sample data

**Table S6.** Lunar sample information

**Text S4.** Martian Image-Based Grain-Size Analysis

**Table S7.** Geological context of Martian landing sites

**Table S8.** Sub-site distribution for Martian landing sites

**Text S5.** Fitted Weibull  $\mu$  parameters

**Table S9.** Weibull parameters for all sites

**Text S6.** Data analysis codes and computational details

**Table S10.** Computational performance of data analysis codes



## **Text S1. Terrestrial Field Sampling and Laboratory Analysis**

This section provides the complete instrument specifications, operating parameters, sampling site metadata, and quality control procedures for the combined sieving–laser diffraction protocol applied to all 2,847 field-collected terrestrial samples.

### **S1.1 Sampling protocol**

Terrestrial field samples ( $n = 2,847$ ) were collected during campaigns conducted between 2015 and 2023 across 18 countries on five continents (Asia, Europe, Africa, North America, Australia). Sampling targeted the upper 10 cm of the surface layer to ensure consistency with the actively weathering zone and to facilitate comparison with orbital remote sensing data. At vegetated sites, surface organic litter was removed prior to sampling.

**Sampling strategy by geomorphic setting.** The sampling approach was tailored to geomorphic context:

- For relatively homogeneous terrain (plains, grasslands, deserts), systematic grid-based transects with 50–200 m spacing were employed.
- For heterogeneous environments (debris-flow deposits, landslides, moraines), targeted sampling of distinct geomorphic units was applied to capture local variability.

**Sample mass and handling.** Individual sample mass ranged from 200 g to 2 kg (median 500 g) to ensure sufficient material for combined sieving–laser diffraction analysis and to obtain representative samples of heterogeneous deposits. Samples were immediately sealed in labeled polyethylene bags, and Global Positioning System (GPS) coordinates were recorded (WGS84 datum, decimal degrees). All samples were transported to the laboratory and stored at 4°C prior to analysis (maximum storage duration: 6 months).

### **S1.2 Laboratory analysis protocol**

All field-collected samples ( $n = 2,847$ ) were processed using a combined sieving–laser diffraction protocol comprising four stages:

**Stage 1: Sample preparation.** Samples were oven-dried at  $104 \pm 2^\circ\text{C}$  for 8–12 h until constant mass (weight change  $<0.1\%$  over successive 2 h intervals). Dried samples were gently disaggregated with a rubber pestle to break up loosely bound aggregates without fracturing individual grains.

**Stage 2: Coarse fraction analysis ( $\geq 0.25$  mm).** Dry sieving was performed using a Retsch AS 200 vibrating sieve shaker (amplitude 1.5 mm, frequency 50 Hz, 15 min duration) with a nested

stack of ASTM E11-compliant meshes: 20, 10, 5, 2, 0.5, and 0.25 mm. Mass retained on each sieve was recorded to  $\pm 0.01$  g.

**Stage 3: Fine fraction analysis (<0.25 mm).** The fine fraction was analyzed with a Malvern Mastersizer 3000 laser diffractometer (Mie theory, measurement range 0.01–3,500  $\mu\text{m}$ ). Sub-samples (0.5–2.0 g) were dispersed in 800 mL deionized water containing 0.05% (w/v) sodium hexametaphosphate and ultrasonicated (40 kHz, 2 min, 30 W). Refractive index settings: 1.55 (real), 0.1 (imaginary). Each sample was measured in triplicate; the median distribution was retained.

**Stage 4: Data integration.** Sieving mass percentages and laser diffraction volume percentages were merged assuming particle density  $\rho = 2.65$   $\text{g/cm}^3$  (quartz-equivalent) following Konert & Vandenberghe (1997). The combined dataset was binned into the 17 standard size classes listed in Table 1 (main text), following USDA and Wentworth classification schemes. Grain frequency  $P(D_i)$  for the  $i$ -th size interval was calculated as:

$$P(D_i) = \frac{m(D_i)}{M_{total}} \quad (1)$$

Where  $m(D_i)$  is the mass of grains in the  $i$ -th size interval and  $M_{total}$  is the total sample mass (Yong et al., 2017). Cumulative exceedance percentages were subsequently derived from the frequency distribution. The complete analytical workflow, including quality control checkpoints, is illustrated in Figure S1.

### S1.3 Quality control

All laboratory analyses followed standard protocols as specified in BS 1377-2, ASTM D422-63, ASTM D6913-04, and ISO 11277:2009. No additional replicate analyses or certified reference material measurements were performed specifically for this study; measurement uncertainty is therefore not quantitatively assessed. Users should interpret the data with this limitation in mind.

All procedures comply with the cited standards.

### S1.4 Literature data screening criteria

Publications employing dry sieving alone or pipette methods without laser diffraction validation were excluded due to incomplete clay fraction characterization or lack of methodological standardization with the combined sieving–laser diffraction protocol adopted as the baseline for this study (BS 1377-2, ASTM D422-63, ASTM D6913-04, ISO 11277:2009). The remaining 43

publications (1,572 samples) all employed methods consistent with this baseline, ensuring cross-study comparability.

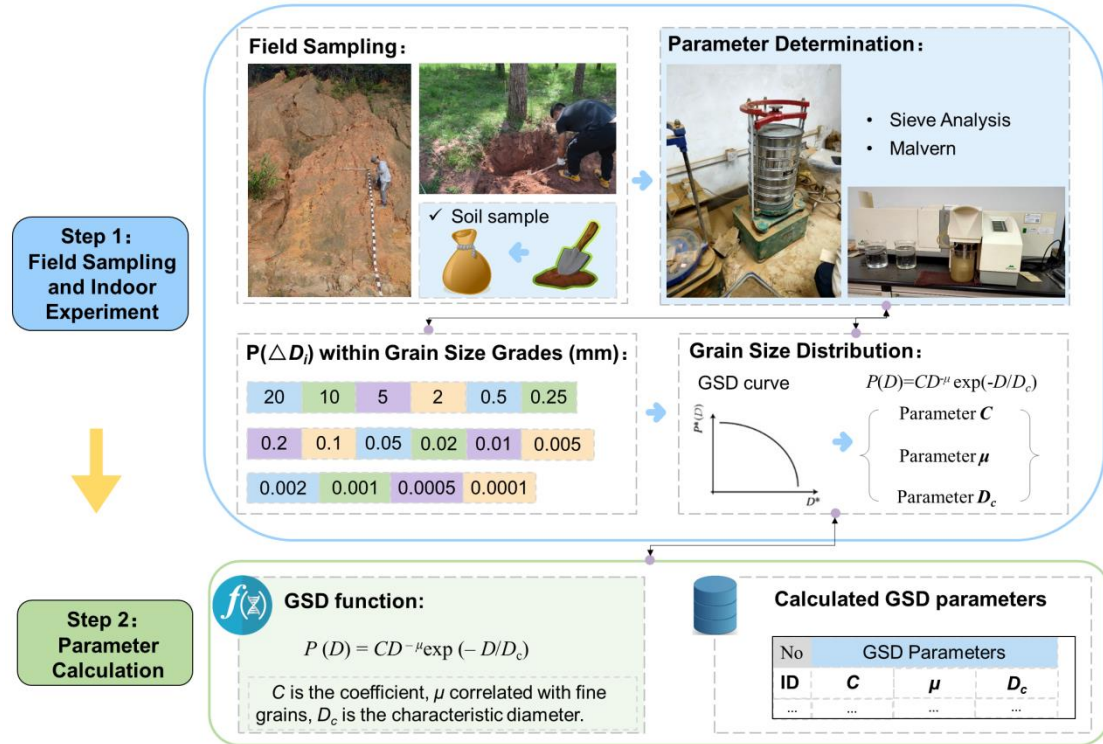

**Figure S1.** Workflow for terrestrial GSD analysis and UGSD parameterization. (a) Four-stage laboratory protocol: oven-drying, dry sieving ( $\geq 0.25$  mm), laser diffraction ( $< 0.25$  mm), and data integration. (b) Binning into 17 standard size classes (Table 1, main text). (c) UGSD fitting to extract parameters  $C$ ,  $\mu$ ,  $D_c$ ,  $n$ . (d) Quality control checkpoints: duplicate analysis, certified reference material, and cross-method validation. This workflow was applied to all 2,847 field-collected samples. Median fitting quality across all terrestrial samples:  $R^2 = 0.991$ .

**Table S1.** Terrestrial soil sampling sites in Asia

| Soil sample | Soil texture                 | Locations                                           | Specimen number | Brief description              | Data sources       |
|-------------|------------------------------|-----------------------------------------------------|-----------------|--------------------------------|--------------------|
| APZ         | Vegetation covered soils     | Apuzu, Liangshan Yi Autonomous Prefecture, SW China | 35              | Red soil                       | Sampled by authors |
| CD          | Basin sediment, purple soils | Chengdu, SW China                                   | 35              | Fluvial deposition             |                    |
| DF          | Debris flow materials        | SW China                                            | 438             | Wide-ranged soils and sediment |                    |
| Ord         | Grass land                   | Erδος, NE China                                     | 42              | Highland                       | Jin et al.,        |

|       |                                  |                             |                                                                  |         |                                                             |                    |
|-------|----------------------------------|-----------------------------|------------------------------------------------------------------|---------|-------------------------------------------------------------|--------------------|
|       | soil                             |                             |                                                                  | pasture | 2011                                                        |                    |
| HN    | Tropic soils                     | Hainan, S China             |                                                                  | 35      | Yellow soils                                                | Sampled by authors |
| Hor   | Grassland soil                   | Horqin, NE China            |                                                                  | 65      | Dark loessial soil, Kastanozems                             |                    |
| JSR   | Jinsha River                     | Sichuan, SW China           |                                                                  | 146     | Torrid red and purple soils                                 |                    |
| JZG   | Wind erosion soil                | Jiuzhaigou, SW China        |                                                                  | 47      | Loess                                                       |                    |
| KLM   | Cold permafrost and desert soils | Kunlun mountain, NW China   |                                                                  | 21      | At different elevations                                     | Gui, et al., 2010  |
| MDG   | Debris flow deposit              | Midui Gully                 | Tibetan Plateau, China                                           | 23      | At debris flow gully                                        | Sampled by authors |
| LLR   | Moraine                          | Lulang River                |                                                                  | 18      | On the surface of river bank                                |                    |
| MJ    | Riverside surface soils          | Minjiang, SW China          |                                                                  | 825     | Yellow brown soils                                          |                    |
| MLP   | Vegetated and bare slopes        | Malipo, S China             |                                                                  | 570     | Red soils                                                   |                    |
| MSZ   | Vegetated covered soils          | Mianzhu town, SW China      |                                                                  | 58      | Brown soils                                                 | Sampled by authors |
| TG    | Grassland                        | Tibet, SW China             |                                                                  | 107     | Cold alpine, meadow soil                                    |                    |
| TMD   | Moraine deposit                  | Tibet, SW China             |                                                                  | 38      | Moraines and other sediments                                |                    |
| XC    | Vegetated covered soils          | Xichang, SW China           |                                                                  | 960     | Brown soils                                                 |                    |
| YM    | Brown soil                       | Yimeng Mountain, E China    |                                                                  | 37      | Vegetated land                                              | Liu et al., 2009   |
| YN    | Red soil                         | Yunnan, SW China            |                                                                  | 58      | Highly, moderately, and weakly weathered "relict" paleosols | Sampled by authors |
| HM    | red yellow soil                  | Hwangsang-Myun, South Korea |                                                                  | 5       | on the gentle and low hills in the coastal area             | Park, 1987         |
| GM    |                                  | Gangok-Myun, South Korea    |                                                                  | 7       |                                                             |                    |
| SBM-m | Brown forest soil                | Hinano mountain             | Sanyo Buntokuden Memorial, Takamatsu, Kagawa Prefecture, Japan   | 5       | Hinano Mountain and hill                                    | Obara, 2015        |
| SBM-h |                                  | Nearby park on the hill     |                                                                  | 5       |                                                             |                    |
| SBM-b |                                  | Beside main building        |                                                                  | 7       |                                                             |                    |
| OHU-n | Red yellow soil                  | Inner court north           | Old Hiroshima University Faculty of Science building, Hiroshima, | 12      | Soils from mountain                                         |                    |
| OHU-s |                                  | Inner court south           |                                                                  | 9       |                                                             |                    |

|     |                                               | Japan                                                     |    |                                              |                   |
|-----|-----------------------------------------------|-----------------------------------------------------------|----|----------------------------------------------|-------------------|
| KOY | Paddy soil                                    | Yoshijima park, Kurashiki City, Okayama Prefecture, Japan | 8  | Soils from mountain and hills                |                   |
| KWS | Kanto loam soil                               | Shinonome No. 2 park, Koto Ward, Tokyo, Japan             | 5  |                                              |                   |
| NTU | Old alluvium soil                             | Nanyang Technological University in Singapore             | 32 | from slopes of granite and metamorphic rocks | Ghosh, 2019       |
| OMK | Red soil                                      | Omkoï in Thailand                                         | 28 | Siliceous soil                               | Jindaluang, 2013  |
| GCS | Aeolian, fluvial, deltaic and marine sediment | Caspian Sea, Iran                                         | 35 | soils from the Gomishan suburbs              | Samiei-Fard, 2021 |

**Table S2.** Terrestrial soil sampling sites in North America

| Soil sample | Soil texture                                        | Locations                               | Specimen number | Brief description                                        | Data sources               |
|-------------|-----------------------------------------------------|-----------------------------------------|-----------------|----------------------------------------------------------|----------------------------|
| Nev         | Desertification soil                                | Nevada, USA                             | 120             | Desertified soil                                         | Spriggs & Ray-Maitra, 2007 |
| TS          | Golf course                                         | USA                                     | 24              | Topdressing sand                                         | Arya, 2008                 |
| CS          |                                                     |                                         |                 | Concrete sand                                            |                            |
| BS          |                                                     |                                         |                 | Bunker sand                                              |                            |
| SCS         | Sandy coastal plain terrace                         | Southern California, USA                | 22              | Fine clay soil                                           | Torrent, 1980              |
| MLS         | Kalkaska County                                     | Michigan, USA                           | 11              | Montcalm loamy sand                                      | Wurman, 1959               |
| MFS         | Kent County                                         |                                         | 7               | Montcalm fine sand                                       |                            |
| CFS         | Calhoun County                                      |                                         | 7               | Coloma fine sand                                         |                            |
| WS          | Kalkaska County                                     |                                         | 6               | Wallace sand                                             |                            |
| MDM         | Dredged materials deposit                           | Somerset County, State of Maryland, USA | 7               | Acid sulfate soil                                        | Demas, 2004                |
| MTM         | Tidal marsh                                         |                                         | 9               |                                                          |                            |
| ALS         | Quaternary terraces of the Tallapoosa River         | East-Central Alabama, USA               | 49              | Coarse/fine loamy soil                                   | Shaw, 2003                 |
| MPS         | Beach ridges on the Northern shore of Lake Michigan | Northern Michigan, USA                  | 43              | Strand plain soil                                        | Barrett, 2001              |
| CCS         | Crosby county                                       | West Texas, USA                         | 55              | Sediments of the Blackwater Draw and Ogallala Formations | Hirmas, 2007               |
| HCS         | Hudspeth county                                     |                                         | 6               | Underling limestone residuum                             |                            |
| WLS         | Northeast Dane County                               | Wisconsin, USA                          | 13              | Soil containing lamellae                                 | Bockheim, 2013             |
| SNC         | Western slope of the Sierra Nevada                  | Western USA                             | 31              | Soils on Andesitic                                       | Rasmussen, 2007            |

|    |                 |        |    |                      |               |
|----|-----------------|--------|----|----------------------|---------------|
|    | of California   |        |    | Lahar                |               |
| FL | Fine loamy soil | Canada | 41 | Central Saskatchewan | Amelung, 1999 |

**Table S3.** Terrestrial soil sampling sites in Africa

| Soil sample | Soil texture                                            | Locations | Specimen number | Brief description           | Data sources |
|-------------|---------------------------------------------------------|-----------|-----------------|-----------------------------|--------------|
| Nig         | Soils from agricultural landscapes of a derived savanna | Nigerian  | 15              | soil from Ibaadan, Nigerian | Salako, 2006 |

**Table S4.** Terrestrial soil sampling sites in Europe

| Soil sample | Soil texture            | Locations             | Specimen number | Brief description                                                 | Data sources                     |                           |
|-------------|-------------------------|-----------------------|-----------------|-------------------------------------------------------------------|----------------------------------|---------------------------|
| GIL         | reddish brown soil      | Ehwald, Germany       | 17              | in the eastern part of the country, in the state of Saxony-Anhalt | 《from soil map volume of Europe》 |                           |
| Kot         | dark reddish brown soil | Kottenforst, Germany  | 23              |                                                                   |                                  |                           |
| Boy         | heavy clay              | Boyadgiev, Bulgaria   | 21              | Soil collected from agricultural fields                           |                                  |                           |
| ALL         | sandy loam              | Allier                | Franc e         | Soil from hills, plains, and valleys                              |                                  |                           |
| CdR         | dark brown soil         | Cime de Rouyon        |                 | 5                                                                 |                                  | Soil from Alps            |
| Cou         | yellowish brown soil    | Coup d'Alzac          |                 | 6                                                                 |                                  | Soil from Dordogne Valley |
| Lac         | reddish brown soil      | Lachamp Raphaël       |                 | 12                                                                |                                  | Soil from alpine meadow   |
| MAT         | dark brown soil         | Mathieu               |                 | 10                                                                |                                  |                           |
| MOR         | dark brown soil         | Morozova, Moscow      | 12              | Soil from forested areas                                          |                                  |                           |
| Dob         | dark grey soil          | Dobrogostów, Poland   | 14              | Soil from coniferous forests                                      |                                  |                           |
| MOS         | dark grey soil          | Grin, Moscow, Russia  | 20              | Soil from the Western Siberian Plain                              |                                  |                           |
| Tis         | dark greyish brown soil | Crisul Alb, Romania   | 30              | soil from Tisza River Plain                                       |                                  |                           |
| Kul         | brown soil              | Kulbäcksliden, Sweden | 35              | Soil from agricultural areas                                      |                                  |                           |

**Table S5.** Terrestrial soil sampling sites in Australia

| Soil sample | Soil texture | Locations          | Specimen number | Brief description         | Data sources  |
|-------------|--------------|--------------------|-----------------|---------------------------|---------------|
| GOO         | sandy loam   | Goodwyn, Australia | 20              | Soil samples from coastal | Minasny, 2007 |

## **Text S2. Literature-Derived Terrestrial Samples**

### **S2.1 Literature screening**

A total of 43 peer-reviewed publications reporting terrestrial grain-size distribution data were compiled for this study. All selected studies met four inclusion criteria: (i) combined sieving for fractions  $\geq 0.063$  mm with laser diffraction or hydrometer analysis for fractions  $< 0.063$  mm, consistent with BS 1377-2, ASTM D422-63, ASTM D6913-04, or ISO 11277:2009 standards; (ii) complete size-range coverage including clay fractions ( $< 2 \mu\text{m}$ ); (iii) cumulative percentages reported in tabular form or in figures of sufficient resolution for accurate digitization; and (iv) geographic coordinates or detailed location descriptions provided.

### **S2.2 Data extraction**

For studies reporting data in tabular form, cumulative grain-size percentages were transcribed directly. For studies reporting data only in graphical format, figures were digitized using WebPlotDigitizer (version 4.5; Rohatgi, 2021). For each figure, at least 10 control points were used to calibrate axes, and data points were extracted at the size classes reported in the original publication. Where studies reported different bin structures than the 17-class framework used in this study, we retained the original size points and applied UGSD fitting (Section 2.4, main text) without interpolation to avoid introducing artifacts.

All extracted data and source citations are provided in [Dataset S1](#).

### **S2.3 Data sources**

The complete list of 43 literature sources is provided in the “Data sources” column of Supplementary [Tables S1–S5](#) and in [Dataset S1](#). Each entry includes the full citation and, where available, the DOI or URL for original publication access.

## **Text S3. Lunar Sample Data**

### **S3.1 Mission overview and sample sources**

The lunar component comprises 379 samples from eight sample-return missions spanning 1969–2024 ([Fig. 2](#); [Supplementary Table S6](#)): Apollo 11, 12, 14, 15, 16, and 17 (USA, 1969–1972), Luna 16, 20, and 24 (USSR, 1970–1976), and Chang’e-5 and Chang’e-6 (China, 2020 and 2024). These missions provide geographic coverage of mare basalt plains (Apollo 11, 12, 17; Luna 16, 24; Chang’e-5), basin-margin highlands (Apollo 14, 16), mare–highland contact zones (Apollo 15),

highland terrains (Luna 20), and the lunar farside South Pole-Aitken basin (Chang'e-6).

Grain-size distribution data were compiled exclusively from published literature; no physical lunar samples were processed by the authors. The majority of samples ( $n = 321$ , 85%) were digitized from the NASA Lunar Soils Grain Size Catalog (Graf, 1993), a comprehensive compilation of Apollo and Luna grain-size distributions measured between 1969 and 1976 using dry sieving protocols. Additional data were obtained from Heiken et al. (1991) for selected Apollo samples ( $n = 56$ ), Zhang et al. (2022) for Chang'e-5 sample CE5C0400 ( $n = 1$ ), and Li et al. (2024) for preliminary Chang'e-6 characterization ( $n = 1$ ).

### **S3.2 Sieving protocols**

For Apollo and Luna missions, dry sieving was performed using nested sieve stacks with mesh sequences that varied by mission. The standard sieve sizes employed across missions included: 0.1, 0.2, 0.25, 0.5, 1, 2, 5, 10, 20, and 40 mm (Graf, 1993). Sample masses ranged from 1.5 to 3 kg (typical Apollo drive tube samples) to <1 g (some Luna return samples). Sieving was conducted using mechanical sieve shakers with vibration amplitude corresponding to 360 V (manufacturer-specific units) and duration of 20 min per sample (Graf, 1993). Prior to analysis, samples were oven-dried at 104°C for 24 h and gently disaggregated using a mortar and pestle to break up loosely bound aggregates without fracturing individual grains (Heiken et al., 1991). All lunar samples in the database have masses >5 g; therefore, no mass-based filtering is required.

### **S3.3 Data extraction and harmonization**

Cumulative grain-size distributions were extracted from published tables or digitized from figures using WebPlotDigitizer software (version 4.5; Rohatgi, 2020). The number of reported size fractions varies by mission protocol, ranging from 9 (Luna) to 15 (Apollo 15, 17), reflecting differences in sieve mesh sequences employed across programs. Grain sizes span approximately 0.001–10 mm, covering the silt-to-gravel range.

Due to variations in sieve mesh sequences across missions, raw lunar GSD data exhibit heterogeneous bin resolutions. However, the UGSD fitting procedure (Section 2.4.2, main text) operates on cumulative percentages at their original grain-size points without requiring interpolation or re-binning, thereby accommodating these mission-specific protocols while preserving original measurement fidelity. This approach ensures that cross-mission comparability is achieved at the parameterization level rather than through potentially biased interpolation of raw data.

Detailed site descriptions, mission dates, sample types, landing-site coordinates, and original data sources are provided in Supplementary [Table S6](#). The complete lunar dataset is available as [Dataset S2](#).

**Table S6.** Soil information from the Moon

| Soil sample | Soil characters                                                                  | Lander Coordinates                        | Landing Date | Specimen number | Sample Return (kg) | Brief description                                              | Data sources                |
|-------------|----------------------------------------------------------------------------------|-------------------------------------------|--------------|-----------------|--------------------|----------------------------------------------------------------|-----------------------------|
| Apollo 11   | ranging from sub-micrometer to millimeter scales                                 | Latitude: 0.674° N, Longitude: 23.473° E  | 20 Jul 1969  | 21              | 21.55              | southwestern part of Mare Tranquillitatis                      | Graf, <a href="#">1993</a>  |
| Apollo 12   | ranging from fine dust to coarse detritus                                        | Latitude: 3.013° S, Longitude: 23.422° W  | 19 Nov 1969  | 20              | 34.35              | the Mare Cognitum region, southeastern Oceanus Procellarum     |                             |
| Apollo 14   | generally coarser and more poorly sorted                                         | Latitude: 3.646° S, Longitude: 17.472° W  | 05 Feb 1971  | 26              | 42.28              | Fra Mauro Highlands                                            |                             |
| Apollo 15   | generally fine particles                                                         | Latitude: 26.132° N, Longitude: 3.633° E  | 30 Jul 1971  | 63              | 77.31              | the Hadley-Apennine region at the foot of the Montes Apenninus |                             |
| Apollo 16   | ranging from sub-micrometer to millimeter scales                                 | Latitude: 8.973° S, Longitude: 15.501° E  | 20 Apr 1972  | 5               | 95.71              | the Descartes Highlands region of the lunar nearside           |                             |
| Apollo 17   | submicron dust to centimeter-scale lithic fragments                              | Latitude: 20.191° N, Longitude: 30.772° E | 11 Dec 1972  | 43              | 110.52             | the Taurus-Littrow Valley                                      |                             |
| CE5C0400    | average GSD < 10 $\mu\text{m}$ , high maturity and prolonged space weathering    | Latitude: 43.058° N, Longitude: 51.916° W | 1 Dec 2020   | 1               | /                  | the Northern Oceanus Procellarum near Mons Rümker              | Zhang, <a href="#">2022</a> |
| CE-6        | Soil grains ranging from <17.6 $\mu\text{m}$ to ~862.4 $\mu\text{m}$ in diameter | 41.625° S, 153.978° W                     | 25 Jun, 2024 | 1               | 1.935              | the South Pole-Aitken basin on the lunar farside               | Li, <a href="#">2024</a>    |

Source: <https://nssdc.gsfc.nasa.gov/planetary/lunar/apolloand.html>

## Text S4. Martian Image-Based Grain-Size Analysis

This section provides detailed protocols for image selection, grain-size measurement, quality control, and uncertainty assessment for all Martian samples in PlanetGSD 1.0. A summary of the geological context for each landing site is provided in [Table S7](#).

### S4.1 Image selection criteria

Images were selected from the PDS archive following established protocols (Fedó et al., 2015; Weitz et al., 2006) to ensure optimal conditions for grain-size measurement:

**(i) Known target distance.** Target distance was extracted from rover telemetry metadata (ROVER\_MOTION\_COUNTER or range from laser autofocus), with accuracy of  $\pm 5$  cm for arm-mounted instruments and  $\pm 10$  m for mast-mounted cameras. Only images with documented target distances were retained.

**(ii) Viewing geometry.** Only images with viewing angle  $< 30^\circ$  from vertical (measured from surface normal) were retained to minimize perspective distortion and grain foreshortening effects. Viewing angle was calculated from camera pointing metadata.

**(iii) Illumination conditions.** Solar elevation  $> 20^\circ$  was required to ensure adequate shadow contrast for grain boundary identification. Solar elevation was extracted from image metadata (Solar\_Longitude and Local\_True\_Solar\_Time). Images acquired during dust storms or with significant atmospheric haze ( $\tau > 1.5$  from Mastcam opacity measurements) were excluded.

A total of 2,160 images meeting these criteria were analyzed to produce the 1,729 grain-size distributions in [Dataset S3](#). The distribution of samples across different geological sub-units at each landing site is detailed in [Table S8](#).

### S4.2 Grain-size analysis protocol

Grain-size distributions were measured using semi-automated image-processing software developed by Shi et al. (2021) and Zhao et al. (2023), implemented in Mathematica. The analysis workflow comprises four steps:

**Step 1: Image preprocessing.** Images were radiometrically calibrated to remove instrumental artifacts (dark current, flat-field response) using PDS-provided calibration files. Contrast was enhanced using adaptive histogram equalization (CLAHE algorithm, tile size  $8 \times 8$  pixels, clip limit

0.02) to improve grain boundary visibility while avoiding amplification of noise.

**Step 2: Grain segmentation.** Individual grains were identified using a combination of edge detection (Canny algorithm with Gaussian smoothing,  $\sigma = 1.5$ , threshold hysteresis 0.1/0.3) and marker-controlled watershed segmentation. The software semi-automatically delineates grain boundaries, with manual correction by the analyst for overlapping or poorly defined grains. For each image, 150–500 grains (median 280) were segmented. Only grains with >70% of their boundary visible within the image frame were retained to avoid truncation bias.

**Step 3: Size measurement.** For each segmented grain, the software calculates the equivalent circular diameter (ECD):

$$D = 2\sqrt{\frac{A}{\pi}} \quad (2)$$

where  $A$  is the grain area in pixels. This diameter approximates the intermediate ( $b$ -axis) diameter used in terrestrial sieve analysis. Pixel dimensions were converted to millimeters using target distance and instrument focal length from image metadata.

**Step 4: Binning and distribution construction.** Individual grain measurements were grouped into logarithmic size bins (0.04, 0.1, 0.2, 0.5, 1, 2, 5, 10, 25 mm) and converted to cumulative mass distributions assuming spherical grains of uniform density ( $\rho = 2.65 \text{ g/cm}^3$ , quartz-equivalent). This assumption introduces a potential source of systematic uncertainty when comparing Martian volume-based distributions to terrestrial and lunar mass-based distributions. However, the UGSD fitting procedure operates on normalized cumulative percentages and is robust to such uniform scaling factors (see [Section 2.4](#), main text).

### S4.3 Imaging systems and detection limits

Grain-size measurements on Mars utilized a variety of imaging systems with different resolutions and detection capabilities. A detailed summary of these instruments, including their type, pixel scale, working distance, and minimum detectable grain size, is provided in [Table 3](#) of the main manuscript. In brief, the detection limits range from approximately 0.04 mm for arm-mounted imagers (MAHLI, WATSON) to over 0.12 mm for mast-mounted cameras (Mastcam, Mastcam-Z, RMI), with the exact values depending on the instrument and target distance. Users are directed to the main text for the complete specifications and references.

#### S4.4 Uncertainty assessment

**Resolution limitations.** The minimum resolvable grain size is instrument-dependent, ranging from  $\sim 40 \mu\text{m}$  for close-range imagers (MAHLI, WATSON) to  $\sim 150 \mu\text{m}$  for mast-mounted cameras (Table S3). Grains smaller than these thresholds cannot be reliably detected and segmented. Consequently, all Martian GSD curves are truncated at the fine end; cumulative percentages for the finest size fraction represent lower bounds rather than absolute values. Users should exercise caution when interpreting fine-fraction statistics (e.g., clay and silt proportions) from Martian samples.

**Inter-operator variability.** To assess operator-dependent variability in grain boundary delineation, three independent analysts processed identical image sets ( $n = 30$  images spanning all four landing sites) using the same software (Shi et al., 2021; Zhao et al., 2023). For each image, each analyst segmented grains following the standard protocol (S4.2), and UGSD parameters were fitted to the resulting distributions. Differences in grain boundary delineation between operators were quantified using coefficients of variation (CV) for the resulting UGSD parameters:

- $\mu$  parameter: mean CV = 6.8% (range 4.2–9.1%)
- $D_c$  parameter: mean CV = 5.7% (range 3.8–8.3%)
- $n$  parameter: mean CV = 7.9% (range 5.1–10.2%)

This variability propagates through the UGSD fitting procedure and is reflected in the parameter confidence intervals reported in Dataset S4. Users should incorporate these uncertainties when conducting comparative analyses sensitive to fine-scale GSD variations.

**Systematic biases.** The assumption of spherical grains of uniform density ( $\rho = 2.65 \text{ g/cm}^3$ ) when converting grain areas to equivalent spherical diameters and subsequently to mass-based cumulative distributions is standard in Martian granulometry studies (Fedo et al., 2015; Weitz et al., 2018). While the UGSD fitting procedure is robust to uniform scaling factors, absolute grain-size values may carry systematic biases relative to sieve-based measurements. Cross-validation with in situ Sieve Analysis (if available) or comparison with terrestrial analogs is recommended for applications requiring absolute accuracy.

#### S4.5 Data accessibility

Complete source image identifiers (PDS Product IDs) for all 1,729 samples are provided in Dataset S3. For each sample, the following metadata are included: landing site, sub-site, rover, Sol number, instrument, target distance, pixel scale, number of grains segmented, and UGSD fitting

parameters with confidence intervals.

**Table S7.** Geological context of Martian landing sites

| Landi<br>ng site       | Rover            | Landi<br>ng<br>date | Coordin<br>ates      | Elevati<br>on (m) | n<br>sampl<br>es | Geologi<br>cal age                                       | Main<br>features                                                                    | Surface<br>processes                                                                                                                                                             |
|------------------------|------------------|---------------------|----------------------|-------------------|------------------|----------------------------------------------------------|-------------------------------------------------------------------------------------|----------------------------------------------------------------------------------------------------------------------------------------------------------------------------------|
| Gale<br>Crater         | Curiosity        | 6 Aug<br>2012       | 4.59°S,<br>137.44°E  | -4,500            | 384              | Late<br>Noachia<br>n-<br>Hesperian                       | Mt. Sharp<br>sedimentar<br>y<br>sequence,<br>paleochan<br>nels,<br>alluvial<br>fans | Lacustrine<br>sedimentat<br>ion, fluvial<br>erosion,<br>aeolian<br>reworking<br>(Grotzinge<br>r et al.,<br><a href="#">2015</a> ;<br>Milliken et<br>al., <a href="#">2010</a> )  |
| Jezero<br>Crater       | Persevera<br>nce | 18 Feb<br>2021      | 18.44°N,<br>77.45°E  | -2,530            | 722              | Noachia<br>n-<br>Hesperian                               | Western<br>delta, inlet<br>channel,<br>carbonate<br>outcrops                        | Deltaic<br>deposition,<br>lake<br>environme<br>nt, post-<br>deposition<br>al erosion<br>(Mangold<br>et al.,<br><a href="#">2021</a> ;<br>Schon et<br>al., <a href="#">2012</a> ) |
| Gusev<br>Crater        | Spirit           | 4 Jan<br>2004       | 14.57°S,<br>175.47°E | -1,950            | 366              | Noachia<br>n<br>(lakes),<br>Hesperian<br>(volcani<br>cs) | Ma'adim<br>Vallis<br>outlet,<br>Columbia<br>Hills,<br>volcanic<br>plains            | Fluvial<br>flooding,<br>basaltic<br>volcanism,<br>hydrother<br>mal<br>alteration<br>(Cabrol et<br>al., <a href="#">2003</a> ;<br>Ruff et al.,<br><a href="#">2014</a> )          |
| Meridi<br>ani<br>Planu | Opportun<br>ity  | 25-<br>Jan-04       | 1.95°S,<br>354.47°E  | -1,400            | 257              | Hesperian                                                | Sulfate-<br>rich<br>sandstone,                                                      | Evaporite<br>deposition,<br>acidic                                                                                                                                               |

|   |                                                  |                                                                                                 |
|---|--------------------------------------------------|-------------------------------------------------------------------------------------------------|
| m | hematite<br>concretion<br>s, aeolian<br>bedforms | groundwater,<br>aeolian<br>transport<br>(Hynek et<br>al., 2017;<br>McLennan<br>et al.,<br>2005) |
|---|--------------------------------------------------|-------------------------------------------------------------------------------------------------|

Note: Coordinates are in IAU Mars 2000 datum. Elevation relative to MOLA areoid. Geological ages follow the Hartmann & Neukum (2001) chronology.

**Table S8.** Sub-site distribution, sample counts, and geological context for Martian landing sites

| Landing site  | Sub-site code | Sub-site name        | Sol range | <i>n</i> samples | Dominant lithology / soil type                                        |
|---------------|---------------|----------------------|-----------|------------------|-----------------------------------------------------------------------|
| Gale Crater   | YB            | Yellowknife Bay      | 125–324   | 36               | Ancient lacustrine mudstone; surficial fine to very fine sand         |
|               | Gob           | Gobabeb              | 1221–1244 | 26               | Aeolian dune sand (medium to coarse) at Bagnold Dunes edge            |
|               | MB            | Murray Buttes        | 1410–1468 | 34               | Eroded lacustrine sandstone; gravelly colluvium                       |
|               | OB            | Ogunquit Beach       | 2555–2691 | 62               | Bimodal aeolian deposit (fine sand matrix + coarse granules)          |
|               | MAG           | Mary Anning & Groken | 2802–2923 | 56               | Clay-bearing unit; fine-grained (silt/clay) weathering residual       |
|               | VRR           | Vera Rubin Ridge     | 2300–2416 | 96               | Hematite-cemented sandstone ridge; mixed coarse debris + aeolian sand |
|               | GT            | Glen Torridon        | 2300–3072 | 38               | Clay-bearing unit; very fine-grained, homogeneous regolith            |
|               | GP            | Greenheugh Pediment  | 2691–2734 | 18               | Aeolian sandstone pediment; well-sorted medium sand                   |
|               | SBU           | Sulfate-bearing Unit | 2923–3072 | 6                | Erosion-resistant evaporite slopes; coarse, angular debris            |
|               | MDI           | Mount Desert Island  | 1650–1660 | 40               | Iron-rich sandstone knob; aeolian sand + local debris                 |
| Jezero Crater | NBD           | Nathan Bridges Dune  | 1617–1639 | 28               | Active dark dune; extremely well-sorted fine to medium sand           |
|               | ADZ           | Adzilili Crater      | 112–148   | 22               | Small impact crater on delta plain; impact breccia + aeolian sand     |
|               | ART           | Artuby Ridge         | 170–200,  | 90               | Carbonate ridge; weathering-dominated coarse debris                   |

---

|                  |     |                           |        |     |                                                             |
|------------------|-----|---------------------------|--------|-----|-------------------------------------------------------------|
|                  |     |                           | 340–   |     |                                                             |
|                  |     |                           | 343    |     |                                                             |
|                  | SEI | Seitah                    | 202–   | 120 | Mg-carbonate/olivine unit;                                  |
|                  |     |                           | 286    |     | coarse-grained residual mantle                              |
|                  | TFR | Three Forks Region        | 379–   | 72  | Delta plain; aeolian-reworked                               |
|                  |     |                           | 414    |     | sandy plain                                                 |
|                  | SKI | Skinner Ridge             | 477–   | 46  | Delta front sandstone ridge;                                |
|                  |     |                           | 496    |     | coarse talus                                                |
|                  | HOG | Hogwallow Flats           | 501–   | 20  | Fine-grained delta plain; aeolian-                          |
|                  |     |                           | 517    |     | sorted fine sand                                            |
|                  | AMA | Amalik                    | 557–   | 74  | Transitional slope; polymict                                |
|                  |     |                           | 581    |     | volcanic-sedimentary mix                                    |
|                  | OM  | Observation Mountain      | 593–   | 80  | Ancient bedrock massif;                                     |
|                  |     |                           | 641    |     | extremely coarse talus                                      |
| Gusev Crater     | CMA | Columbia Memorial Station | 1–36   | 36  | Landing site plain; mixed aeolian sand + local debris       |
|                  | BC  | Bonneville Crater         | 65–91  | 52  | Young impact crater; ejecta + aeolian infill                |
|                  | MC  | Missoula Crater           | 93–111 | 89  | Small impact crater; ejecta + aeolian mix                   |
|                  | LC  | Lahontan Crater           | 126–   | 81  | Moderate-sized crater;                                      |
|                  |     |                           | 140    |     | composite ejecta/weathering/aeolian mix                     |
|                  | IP  | Intercrater Plains        | 111–   | 101 | Plains between craters; highly                              |
|                  |     |                           | 126,   |     | homogenized aeolian sand                                    |
|                  |     |                           | 140–   |     |                                                             |
|                  |     |                           | 156    |     |                                                             |
|                  | CH  | Columbia Hills            | 156–   | 92  | Ancient bedrock hills;                                      |
|                  |     |                           | 235    |     | weathering-dominated residual-colluvial                     |
|                  | LL  | Larry's Lookout           | 436–   | 60  | Ridge-top within Columbia                                   |
|                  |     |                           | 513    |     | Hills; olivine basalt debris                                |
|                  | HH  | Husband Hill              | 514–   | 24  | Highest point in Columbia Hills;                            |
|                  |     |                           | 705    |     | multi-lithology colluvium                                   |
|                  | EID | El Dorado                 | 706–   | 67  | Light-toned dune field; well-                               |
|                  |     |                           | 711    |     | sorted fine sand                                            |
|                  | HP  | Home Plate                | 1501–  | 70  | Layered volcanoclastic plateau;                             |
|                  |     |                           | 2100   |     | weakly weathered mixed debris                               |
| Meridiani Planum | EAC | Eagle Crater              | 1–57   | 40  | Small impact crater;                                        |
|                  |     |                           |        |     | sulfate/hematite ejecta + aeolian sand                      |
|                  | FC  | Fram Crater               | 82–90  | 35  | Small crater; well-sorted aeolian sand + hematite spherules |

---

|     |                  |           |    |                                                            |
|-----|------------------|-----------|----|------------------------------------------------------------|
| ENC | Endurance Crater | 95–315    | 53 | Medium-sized crater; diverse ejecta/weathering/aeolian mix |
| HS  | Heat Shield      | 347–356   | 46 | Anthropogenic impact site; aeolian sand + metallic debris  |
| PR  | Purgatory Ripple | 461–484   | 42 | Active aeolian ripple field; well-sorted sand              |
| VC  | Victoria Crater  | 1292–1622 | 41 | Large complex crater; multi-tiered ejecta + aeolian dunes  |

### Text S5. Fitted Weibull $\mu$ Parameters for Grain-Size Distributions

The UGSD parameter  $\mu$  has been found to satisfy the Weibull distribution (Yong et al., 2017; Zhang et al., 2022, 2023, 2025). Accordingly, Weibull distributions were fitted to the UGSD parameters of terrestrial, lunar, and Martian soils to derive the corresponding  $\mu$  values (Table S9). These parameters are also provided in Dataset S4 (Sheet 2) in the Figshare repository.

**Table S9.** Weibull parameters for all sites

| Planet | Site | $\mu_0$ | $k$   | $\lambda$                        | Dominant process                             | Geological description                          |
|--------|------|---------|-------|----------------------------------|----------------------------------------------|-------------------------------------------------|
| Earth  | APZ  | 0.105   | 0.114 | 1.695                            | Subtropical red soil, vegetated hillslope    | Pedogenesis with bioturbation                   |
|        | XC   | 0.013   | 0.023 | 2.25                             | Vegetated hillslope, brown soil              |                                                 |
|        | JSR  | 0       | 0.036 | 3.009                            | River valley, torrid red and purple soils    | Fluvial transport with chemical weathering      |
|        | MSZ  | 0.264   | 0.246 | 2.752                            | Post-earthquake vegetated slope, brown soil  | Pedogenesis with mass wasting                   |
|        | MJ   | 0.244   | 0.345 | 1.014                            | River bank and floodplain, yellow-brown soil | Fluvial transport and deposition                |
|        | CD   | 0.073   | 0.195 | 1.326                            | Alluvial basin, purple soil                  | Fluvial deposition                              |
|        | JZG  | 0.199   | 0.283 | 6.376                            | Loess-mantled valley, wind-eroded surface    | Aeolian deposition and erosion                  |
|        | NJG  | 0.001   | 0.005 | 0.617                            | Debris-flow gully, poorly sorted deposit     | Gravity-driven transport                        |
|        | WJG  | 0       | 0.020 | 5.448                            | Wide-graded gully deposit                    | Gravity-driven transport with fluvial reworking |
|        | KLM  | 0.007   | 0.024 | 1.303                            | High-altitude permafrost and desert soil     | Cryogenic processes with aeolian erosion        |
|        | HN   | 0.294   | 0.354 | 1.354                            | Tropical lateritic yellow soil               | Intense chemical weathering                     |
| YN     | 0    | 0.088   | 1.677 | Highly weathered relict paleosol | Chemical weathering (paleo-pedogenesis)      |                                                 |

|             |       |       |       |                                 |                                                   |                                               |
|-------------|-------|-------|-------|---------------------------------|---------------------------------------------------|-----------------------------------------------|
|             | DF    | 0.205 | 0.211 | 4.726                           | Debris flow materials, wide-ranged soils          | Gravity-driven transport                      |
|             | MLP   | 0.040 | 0.048 | 4.53                            | Subtropical vegetated and bare slope, red soil    | Pedogenesis with slope erosion                |
|             | MDG   | 0.186 | 0.147 | 0.923                           | Debris flow gully, Tibetan Plateau                | Gravity-driven transport                      |
|             | LLR   | 0.058 | 0.049 | 0.487                           | Moraine, river bank                               | Glacial transport                             |
|             | TMD   | 0     | 0.018 | 1.313                           | Moraine deposit                                   | Glacial transport                             |
|             | TG    | 0     | 0.134 | 0.811                           | Cold alpine meadow soil                           | Cryogenic processes with biotic influences    |
|             | Ord   | 0.081 | 0.117 | 1.144                           | Grassland, highland pasture                       | Aeolian erosion with biotic influences        |
|             | YM    | 0.038 | 0.077 | 0.564                           | Vegetated land, brown soil                        | Biological processes                          |
| <b>Moon</b> | Ap 12 | 0     | 0.053 | 2.076                           | Oceanus Procellarum mare basalt regolith          | Impact comminution                            |
|             | Ap 14 | 0     | 0.066 | 2.050                           | Fra Mauro highland ejecta blanket                 | Impact comminution with ejecta mixing         |
|             | Ap 15 | 0     | 0.067 | 2.113                           | Hadley-Apennine mare - highland boundary regolith | Impact comminution                            |
|             | Ap 16 | 0.028 | 0.053 | 4.482                           | Descartes highland, multiple ejecta blankets      | Impact comminution with multi-source mixing   |
|             | Ap 17 | 0.005 | 0.077 | 1.834                           | Taurus-Littrow valley, mare - highland contact    | Impact comminution                            |
|             | Lu 24 | 0     | 0.058 | 1.834                           | Mare Crisium basaltic regolith                    |                                               |
|             | Gob   | 0.583 | 0.673 | 1.011                           | Aeolian, wind-formed ripples                      | Aeolian sorting                               |
| <b>Mars</b> | MB    | 0.787 | 0.909 | 2.666                           | Eroded lacustrine sandstone                       | Lacustrine deposition with aeolian erosion    |
|             | MAG   | 0.839 | 1.022 | 2.018                           | Clay-rich laminated mudstone                      | Lacustrine processes with chemical weathering |
|             | VRR   | 0.777 | 0.804 | 2.503                           | Hematite-bearing ridge, erosional                 | Chemical weathering with aeolian erosion      |
|             | MAA   | 3.142 | 3.180 | 5.636                           | Clay-rich laminated mudstone/siltstone            | Hydraulic sorting with chemical weathering    |
|             | ADZ   | 1.026 | 1.100 | 2.159                           | Delta plain, coarse sand/granules                 | Deltaic deposition                            |
|             | ART   | 0.943 | 0.931 | 3.003                           | Weathering-dominated, coarse-grained              | Chemical weathering                           |
|             | SEI   | 0.712 | 0.714 | 1.657                           | Coarse sand to granules                           | Aeolian erosion                               |
|             | BC    | 0.521 | 0.729 | 2.145                           | Coarse sand to gravel                             | Aeolian erosion                               |
|             | CH    | 1.179 | 1.279 | 2.829                           | Rock outcrops, colluvium, aeolian sand            | Mass wasting with aeolian erosion             |
| LL          | 0.218 | 0.367 | 1.260 | Columbia Hills, olivine basalt, | Weakly altered volcanic                           |                                               |

|     |       |       |       |                                             |                                       |
|-----|-------|-------|-------|---------------------------------------------|---------------------------------------|
|     |       |       |       | weak weathering                             | bedrock                               |
| HP  | 0.161 | 0.433 | 2.157 | Mixed volcanic-sedimentary, weak weathering | Weakly altered volcanic bedrock       |
| EAC | 2.654 | 2.382 | 1.219 | Impact-excavated and aeolian                | Impact gardening with aeolian erosion |
| FC  | 0.110 | 0.909 | 2.666 | Well-sorted aeolian and impact ejecta       | Aeolian erosion                       |
| ENC | 0.444 | 0.673 | 1.745 | Impact ejecta, weathering, and aeolian      | Mixed processes                       |
| HS  | 0     | 0.477 | 3.029 | Aeolian sand dominant                       | Aeolian erosion                       |

**Note:** Site-level Weibull parameters are derived from fitting three-parameter Weibull distributions to the  $\mu$ -value populations at each sampling location. These parameters enable stochastic generation of  $\mu$ -fields for numerical simulations (see [Code S1](#)).

## Text S6. Data Analysis Codes and Computational Details

### S6.1 Software environment

All data processing and statistical analysis were performed using Python 3.9 with the following packages: NumPy 1.23, SciPy 1.9, and Matplotlib 3.6. All codes are openly available in the PlanetGSD 1.0 repository at Figshare (<https://doi.org/10.6084/m9.figshare.31569616>) and as supplementary files accompanying this paper.

### S6.2 Code descriptions

#### Code S1: UGSD Parameterization

For each sample, the cumulative GSD curve  $P(>D)$  is fitted to the UGSD function (Eq. 1 in main text) using nonlinear least-squares optimization (`scipy.optimize.curve_fit`) to extract four parameters:  $C$ ,  $\mu$ ,  $D_c$ , and  $n$ . Initial parameter guesses are set as  $C = 80$ ,  $\mu = 0.5$ ,  $D_c = 10$ , and  $n = 0.5$ . Goodness-of-fit is quantified by  $R^2$ . [Code S1](#) accepts input as Excel files (columns: grain size / mm, cumulative percentage / %) and outputs a table of fitted parameters.

#### Code S2: Weibull Distribution Fitting

At each site, the population of  $\mu$  values is fitted to the three-parameter Weibull distribution (Eq. 3) using maximum likelihood estimation (`scipy.stats.weibull_min.fit`). The shape parameter  $k$ , scale parameter  $\lambda$ , and location parameter  $\mu_0$  are extracted. [Code S2](#) generates diagnostic plots including probability density functions and Q–Q plots for fit validation.

#### Code S3: Stochastic Granular Field Generation

To construct spatially continuous  $\mu$ -fields, [Code S3](#) implements the three-step Monte Carlo

workflow of Zhang et al. (2022): (i) generate an ensemble of  $N$  random  $\mu$  values by sampling from the fitted Weibull distribution; (ii) assign values to a DEM-registered grid via inverse-distance-weighted (IDW) interpolation (power = 2); (iii) export the  $\mu$ -field as GeoTIFF for visualization in GIS software. Users can specify DEM resolution, interpolation radius, and the number of Monte Carlo realizations.

### S6.3 Reproducibility

All codes are provided as Jupyter notebooks with example datasets and detailed documentation. Users can reproduce all figures and tables in this paper by running the notebooks sequentially.

**Table S10.** Computational performance of data analysis codes (tested on Intel i7-10700 CPU with 32 GB RAM)

| Code | Task                     | Execution Time              |
|------|--------------------------|-----------------------------|
| S1   | UGSD fitting             | ~0.5 s per sample           |
| S2   | Weibull parameterization | ~2 s per site               |
| S3   | $\mu$ -field generation  | ~30 s per 1 km <sup>2</sup> |
